# Regional brain development analysis through registration using anisotropic similarity, a constrained affine transformation

Antoine Legouhy<sup>1\*</sup>, Olivier Commowick<sup>1</sup>, Maïa Proisy<sup>1,2</sup>, François Rousseau<sup>3</sup>, Christian Barillot<sup>1</sup>,

**1** Univ Rennes, CNRS, INRIA, INSERM, IRISA UMR 6074, Empenn ERL U-1228, F-35000, Rennes, France

**2** CHU Rennes, Radiology Department, F-35033 Rennes, France

**3** IMT Atlantique, LaTIM U1101 INSERM, UBL, Brest, France

\* [antoine.legouhy@irisa.fr](mailto:antoine.legouhy@irisa.fr)

## Abstract

We propose a novel method to quantify brain growth in 3 arbitrary orthogonal directions of the brain or its sub-regions through linear registration. This is achieved by introducing a 9 degrees of freedom (dof) transformation called anisotropic similarity which is an affine transformation with constrained scaling directions along arbitrarily chosen orthogonal vectors. This gives the opportunity to extract scaling factors describing brain growth along those directions by registering a database of subjects onto a common reference. This information about directional growth brings insights that are not usually available in longitudinal volumetry analysis. The interest of this method is illustrated by studying the anisotropic regional and global brain development of 308 healthy subjects between 0 and 19 years old. A gender comparison of those scaling factors is also performed for 4 classes of age. We demonstrate through these applications the stability of the method to the chosen reference and its ability to highlight growth differences across regions and gender.

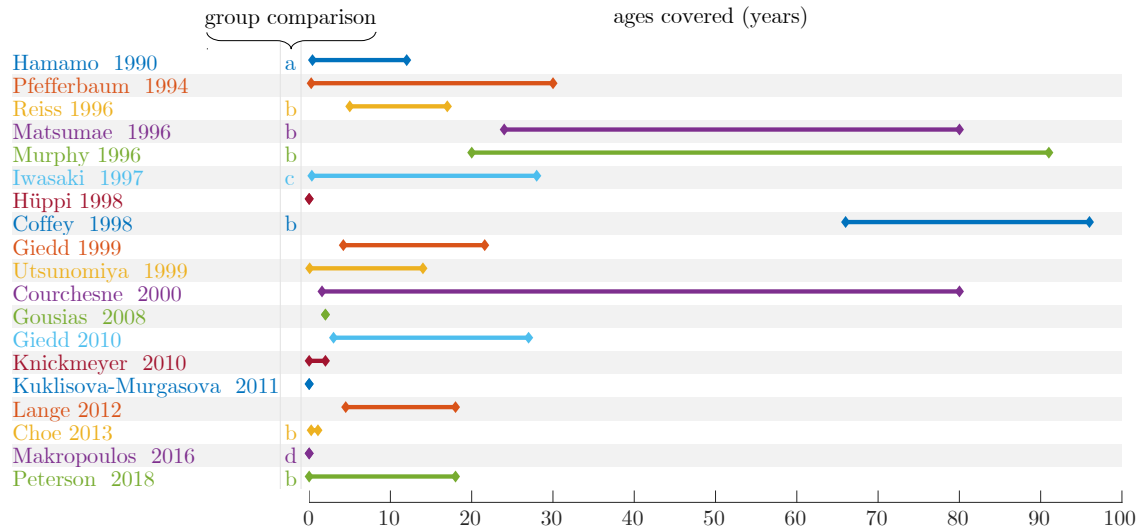

**Fig 1.** Ages covered by different brain volumetry studies, group comparison between: a - normal / mental retardation, b - male / female, c - normal / motor disturbances, d - normal / premature. [7], [8], [9], [10], [11], [12], [13], [14], [15], [16], [17], [18], [6], [19], [20], [21], [22], [23], [24]

## Introduction

In pediatric image analysis, the study of brain development provides insights in the normal trend of brain evolution and enables early detection of abnormalities. Many types of morphometric measurements based on structural images have been explored and have shown their reliability as biomarkers in clinical use as established in [1]. Evaluated on a database of subjects covering a period of interest, it allows to better model the brain development and to highlight changes in growth, shape, structure, etc. Those measurements can be conducted on geometrical objects of different dimensions. Unidimensional ones such as the bicaudate ratio (minimum intercaudate distance divided by brain width along the same line) have been explored in [2] and [3] but also biparietal, bifrontal and transverse cerebellar diameters in [4], as well as more areal quantities such as cortical surface in [5] or corpus callosum mid-sagittal area in [6]. However, the vast majority of studies are based on 3D features through the assessment of region of interest (ROI) volumes. Volumetry measures of different regions of the brain have been considered for specific ages or various temporal ranges. A far from exhaustive list is presented in Figure 1. Studied regions are very heterogeneous from large areas such as the whole brain itself, cerebellum, lobes or partitions of those to smaller ones such as basal ganglia, hippocampus, thalamus sometimes even separated

according to the composition of their tissues (white matter (WM), gray matter (GM), cerebro-spinal fluid (CSF)). Some group comparisons have also been performed mostly between male and female or between preterm and term newborns.

Morphometric measurements can be determined manually. However, this requires the intervention of a medical expert able to select specific landmarks or perform segmentation. These tasks are highly time consuming with a potentially large inter-expert variability. Advances in computational medical imaging allow nowadays the use of semi-automated (requiring some human intervention) or fully-automated techniques. They involve algorithms able to automatically perform operations such as registration and segmentation.

A major drawback of purely volumetric measurements is that they do not provide any information on the shape of the regions or about the anisotropy of their development. In this paper, a new method is proposed that aims at quantifying global and regional brain growth in three arbitrary orthogonal directions of the brain (or ROI) through linear registration. To do so, a transformation called anisotropic similarity is introduced in section 1. It is an affine transformation with scaling directions constrained by orthogonal vectors arbitrarily chosen. A method to estimate, in a 3 dimensional space, the optimal anisotropic similarity for the least squares problem of distances between two sets of paired points is presented in section 2. Those results will then be used to create a registration algorithm based on this transformation. By registering a database of subjects onto a common basis (i.e. an atlas segmented in different ROIs) using anisotropic similarity, we have the opportunity to extract global or regional scaling ratios for all those subjects along arbitrary chosen orthogonal directions.

A direct application is, using the pipeline exposed in section 3, the exploration of regional scaling ratios growth charts along three fixed orthogonal directions through the ages highlighting anisotropic brain development. Resulting curves for whole brain and ROIs (lobes, basal ganglias, cerebellum...) are presented in section 4.2. A comparison of scaling factors from males and females is performed for 4 different classes of age between 0 and 19 years old in section 4.3. Finally, the influence of the common reference image on the resulting scaling factors is studied in section 4.4.

Anisotropic similarity registration algorithm as well as other image processing tools

used in this paper are publicly available in Anima<sup>1</sup> (open source software for medical image processing).

## 1 Theoretical background

### 1.1 Generalities about linear transformations and anisotropic similarity especially

An affine transformation is a composition of a linear map  $A$  ( $N \times N$  matrix) and a translation  $t$  (in  $\mathbb{R}^N$ ) operating on coordinates:  $y = Ax + t$ . Using singular value decomposition (SVD) on  $A$ , we obtain:

$$A = VDW^T \quad (1)$$

where  $W$  and  $V$  are unitary matrices and  $D$  is a positive diagonal matrix. By introducing  $R = V \cdot \text{Det}(V)$ ,  $U = W \cdot \text{Det}(W)$  and  $S = \text{Det}(V) \text{Det}(W)D$ , we get a modified decomposition:

$$A = RSU^T \quad (2)$$

where  $U$  is a rotation matrix defining the directions of scaling,  $S$  is a diagonal scaling matrix and  $R$  is a rotation matrix. We define a new linear transformation, hereafter named anisotropic similarity, which is an affine transformation with constrained directions of scaling. In other words, we define an anisotropic similarity transformation as an affine one where  $U$  is fixed. Summing up, we have the following in 3D space:

- An affine transformation has 12 degrees of freedom:
  - a rotation (3 dof): the matrix  $U$  determines scaling directions.
  - an anisotropic scaling (3 dof): matrix  $S$ .
  - a rotation (3 dof): matrix  $R$ .
  - a translation (3 dof): vector  $t$ .
- For an anisotropic similarity, the directions of scaling defined by  $U$  are constrained. This leaves 9 dof: 3 for rotation, 3 for scaling and 3 for translation.

<sup>1</sup>Anima: [github.com/Inria-Visages/Anima-Public/](https://github.com/Inria-Visages/Anima-Public/)

- For a similarity, the scaling part is constrained to have identical values on the diagonal i.e.  $S = s \text{Id}$  with  $s \in \mathbb{R}$  leading to a linear part of the form  $sRU^T$ . This leaves 7 dof: 3 for rotation, 1 for scaling and 3 for translation.
- For a rigid transformation, the scaling part is constrained to identity leading to a linear part of the form  $RU^T$  which is a rotation matrix since rotation matrices form a group for matrix multiplication. This leaves 6 dof: 3 for rotation and 3 for translation.

## 1.2 Generalities about linear registration

Registration consists in finding an optimal transformation that matches a moving image onto a reference image. This transformation is usually obtained by maximizing a similarity criterion. Many rigid (or linear in general) registration methods have been developed. They can be divided into two families: the ones that try to match geometrical features such as contours or surfaces, and those called iconic that are based on voxel intensities. Some of them use a global similarity measure between the two images such as mutual information in [25] and [26], while others rely on local similarities. Among this second category of approaches, block matching strategies exposed in [27] and [28] have gained in popularity. In those methods, two steps are iterated:

1. Matching: for a set of blocks established in the reference image, homologous blocks best satisfying a similarity criterion are searched in the moving image.
2. Aggregation into a global transformation: an optimization is performed in order to find the global transformation minimizing a distance between the sets of blocks and is then applied to the moving image. Usually, the weighted sum of squared euclidean distance is chosen for the cost function.

In order to perform an anisotropic similarity registration using the block-matching method, the two steps mentioned above have to be iterated. The first one (matching) is performed the same way it would be for any regular linear transformation. It outputs two sets of paired points:  $x$  and  $y$  that are in our case the centers of the homologous blocks. The second step (aggregation onto a global transformation) however is dependent on the type of linear transformation we want to determine leading to an

adapted optimization in each case. 102

This optimization step consists in finding, in the set of eligible transformations, the 103  
one that best maps  $x$  onto  $y$ . Let  $x = \{x_1, \dots, x_M\}$  and  $y = \{y_1, \dots, y_M\}$  be two sets 104  
of  $M$  paired points coming from the matching step. For a global transformation with 105  
linear part  $A$  and translational part  $t$ , the least squares problem associated to the 106  
matching of  $x$  and  $y$  consists in the minimization of the following criterion: 107

$$C(A, t) = \sum_i \|y_i - (Ax_i + t)\|^2 \quad (3)$$

**Remark.** For the sake of clarity we presented a version with a non-weighted least 108  
squares problem but the reasoning is the same with a weighted one. 109

The optimal translation  $\hat{t}$  can be directly obtained from the optimal linear part 110  
(independently of the type of linear transformation) from the barycenters of the two sets 111  
of points as developed in [29]. Let  $\bar{x} = \frac{1}{N} \sum_i x_i$  and  $\bar{y} = \frac{1}{N} \sum_i y_i$ , we have then: 112

$$\hat{t} = \bar{y} - \hat{A}\bar{x} \quad (4)$$

Let  $x'_i = x_i - \bar{x}$  and  $y'_i = y_i - \bar{y}$  be the barycentric coordinates, the problem can then be 113  
simplified as: 114

$$C(A, t) = \sum_i \|y'_i - Ax'_i\|^2 \quad (5)$$

In the case of the linear part being affine, there is no constraint. A closed form solution 115  
can therefore be easily found as shown in [29]. For rigid and similarity transformations, 116  
constraints lead to more complicated lagrangians but a closed form solution can be 117  
found as well using unit quaternions in 3D space as a representation of rotations like 118  
in [30] and [29]. 119

## 2 Optimal anisotropic similarity between two sets 120 of paired points 121

To our knowledge, the optimization procedure in the case of anisotropic similarities has 122  
not been considered in the literature. We thus present a method also based on 123

quaternions to find the optimal anisotropic similarity between two sets of paired points. 124

Writing  $A$  as its decomposition, the goal is to minimize the following criterion: 125

$$C(R, S) = \sum_i \|y'_i - RSU^T x'_i\|^2 \quad (6)$$

Where  $U$  is fixed. Let  $\tilde{x}_i = U^T x'_i$ ,  $\xi_i = S\tilde{x}_i$  126

$$\tilde{C}(R, S) = \sum_i \|y'_i - R\xi_i\|^2 \quad (7)$$

$R$  can be expressed using quaternions following [30] and [29] and the problem then becomes (see A.1): 127 128

$$\tilde{C}(q, S) = \sum_i \|y'_i * q - q * \xi_i\|^2 \quad (8)$$

Where  $q$  is a unit quaternion and  $*$  is the quaternion multiplication. Let  $p$  and  $q$  be quaternions. There is a matricial representation of quaternions allowing to express quaternion product as a matrix product. Matricial quaternions  $P$  and  $Q$  are defined such that:  $Q_p q = p * q$  and  $P_p q = q * \bar{p} \Leftrightarrow P_p^T q = q * p$ . 129 130 131 132

$$Q_p = \begin{pmatrix} p_1 & -p_2 & -p_3 & -p_4 \\ p_2 & p_1 & -p_4 & p_3 \\ p_3 & p_4 & p_1 & -p_2 \\ p_4 & -p_3 & p_2 & p_1 \end{pmatrix} \quad \text{and} \quad P_p = \begin{pmatrix} p_1 & p_2 & p_3 & p_4 \\ -p_2 & p_1 & -p_4 & p_3 \\ -p_3 & p_4 & p_1 & -p_2 \\ -p_4 & -p_3 & p_2 & p_1 \end{pmatrix} \quad (9)$$

Using those matricial quaternions on  $y'_i$  and  $\xi_i$  taken as pure quaternions, we have 133  $y'_i * q = Q_{y'_i} q$  and  $-q * \xi_i = -P_{\xi_i}^T q = P_{\xi_i} q$ . Thus, we obtain the following criterion (see 134 A.2): 135

$$\tilde{C}(q, S) = q^T \left( -\sum_i (Q_{y'_i} + P_{\xi_i})^2 \right) q \quad (10)$$

For further computation, we denote  $B_i = -(Q_{y'_i} + P_{\xi_i})^2$  and  $B = \sum_i B_i$ . A lagrangian with unit constraint  $q^T q = 1$  has then to be added to ensure a unit quaternion: 136 137

$$\Lambda = q^T B q - \lambda(q^T q - 1) \quad (11)$$

The derivatives of this new formulation can then be written as:

$$\begin{cases} \frac{\partial \Lambda}{\partial q} &= (B - \lambda I_4)q \\ \frac{\partial \Lambda}{\partial s_j} &= -q^T \left( \sum_i Q_{y'_i} \frac{\partial P_{\xi_i}}{\partial s_j} \right) q + s_j \sum_i \tilde{x}_{ji}^2 \end{cases} \quad (12)$$

Derivative with respect to  $q$  depends upon  $s_j$  and vice versa. Therefore, a direct solution to the problem of minimizing  $\tilde{C}(q, S)$  is difficult to find if not impossible.

However, separating the problem between  $S$  and  $q$  leads to an alternate optimization scheme, each having an analytical solution.

*Rotation:*

$$\frac{\partial \Lambda}{\partial q} = 0 \Leftrightarrow (B - \lambda I_4)q = 0 \quad (13)$$

Solving this equation amounts finding the eigen vectors of  $B$ . More precisely, the global minimum  $\hat{q}$  is the one associated to the smallest eigen value of  $B$  as shown in [30], [29].

*Scaling:* (see A.3)

$$\frac{\partial \Lambda}{\partial s_j} = 0 \Leftrightarrow \hat{s}_j = \frac{1}{\sum_i \tilde{x}_{ji}^2} q^T \left( \sum_i Q_{y'_i} \frac{\partial P_{\xi_i}}{\partial s_j} \right) q \quad (14)$$

Now, interestingly the matrices  $Q_{y'_i} \frac{\partial P_{\xi_i}}{\partial s_j}$  have a quite trivial form. They are all symmetric, only the placing and indexes change (see A.4). We finally get the following iterative alternate optimization scheme:

- For a fixed value of  $\hat{S}$ , estimate the new optimal rotation quaternion:  $\hat{q}$  as the eigenvector with the smallest eigenvalue of  $B$
- For a fixed value of  $\hat{q}$ , estimate the new optimal scaling matrix

$$\hat{S} = \text{Diag}(\hat{s}_1, \hat{s}_2, \hat{s}_3) \text{ following:}$$

$$\hat{s}_j = \frac{1}{\sum_i \tilde{x}_{ji}^2} \hat{q}^T \left( \sum_i Q_{y'_i} \frac{\partial P_{\xi_i}}{\partial s_j} \right) \hat{q}$$

### 3 Material and methods

In the previous section, a method to find the optimal anisotropic similarity between two sets of paired points has been depicted. This gives the opportunity to register a database



of subjects onto a common reference image using this type of linear transformation to  
 extract scaling factors along chosen orthogonal directions and to study the variation of  
 these factors on different ROIs between populations or among normal subjects.

### 3.1 Material

308 T1-weighted images of healthy subjects between 0 and 19 years old have been used,  
 coming from three different studies: ASLpedia (section 6.1.1), C-MIND (section 6.1.2)  
 and the Developing Human Connectome Project (dHCP) (section 6.1.3). Details on age  
 repartition among databases and on image characteristics are given in Figure 2.

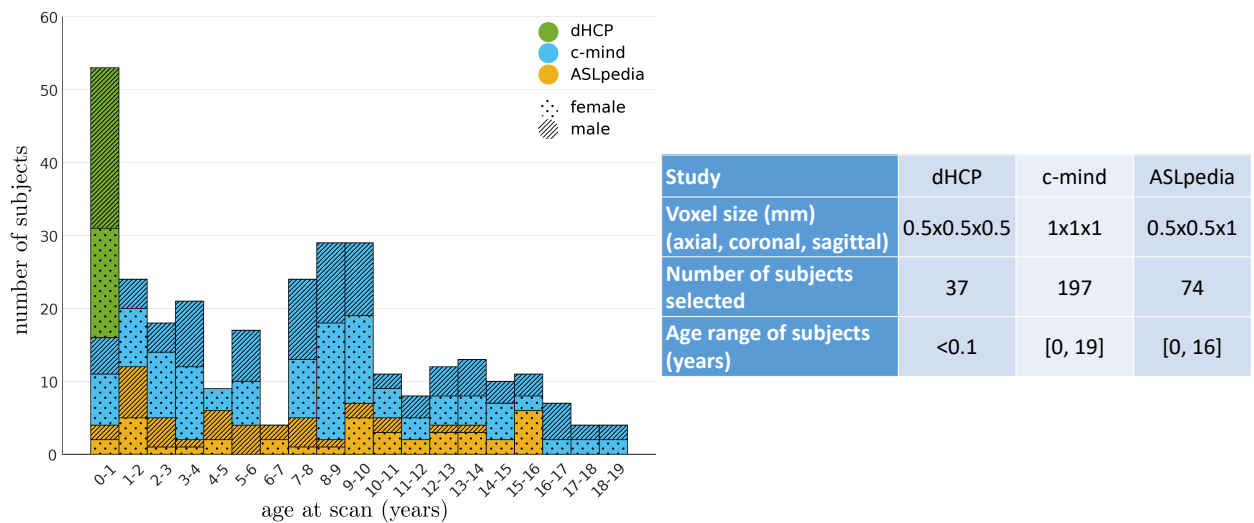

**Fig 2.** Repartition of the subjects selected from three studies over age

### 3.2 Methods

We developed a pipeline composed of 5 steps to extract scaling factors for 3 orthogonal directions on ROIs from a database of subjects.

1. Choice and construction of the common reference image
2. Segmentation of the common reference image into different ROIs
3. Choice of the constrained directions of scaling for the anisotropic similarity registration
4. Anisotropic similarity registration of a database of subjects to each ROIs of the common reference image to extract relative scaling factors

5. Renormalization of the relative scaling factors to obtain absolute scaling factors 175

The above numbers associated to the steps are also associated to the subsections 176

numbering below and to the numbers in Figure 3. 177

### 3.2.1 Creation of the common reference image 178

For genericity, the common reference image has been chosen to be an atlas made from 179

all the subjects using a modified version of the atlas creation algorithm from [31] 180

available in Anima-Scripts<sup>2</sup> (open source scripts for medical image processing). The 181

original method computes an atlas up to an affine transformation, biased in that sense 182

by the reference image. This is due to the fact that, in the process, only the residual 183

local transformations are averaged, ignoring global affine ones. Our method, developed 184

in [32], takes advantage of the log-Euclidean framework developed in [33] and the 185

Baker-Campbell-Hausdorff formula, mentioned in [34] and [35], allowing to average the 186

composition of an affine transformations and a diffeomorphism. This adjustment leads 187

to the creation of atlases up to a rigid transformation. 188

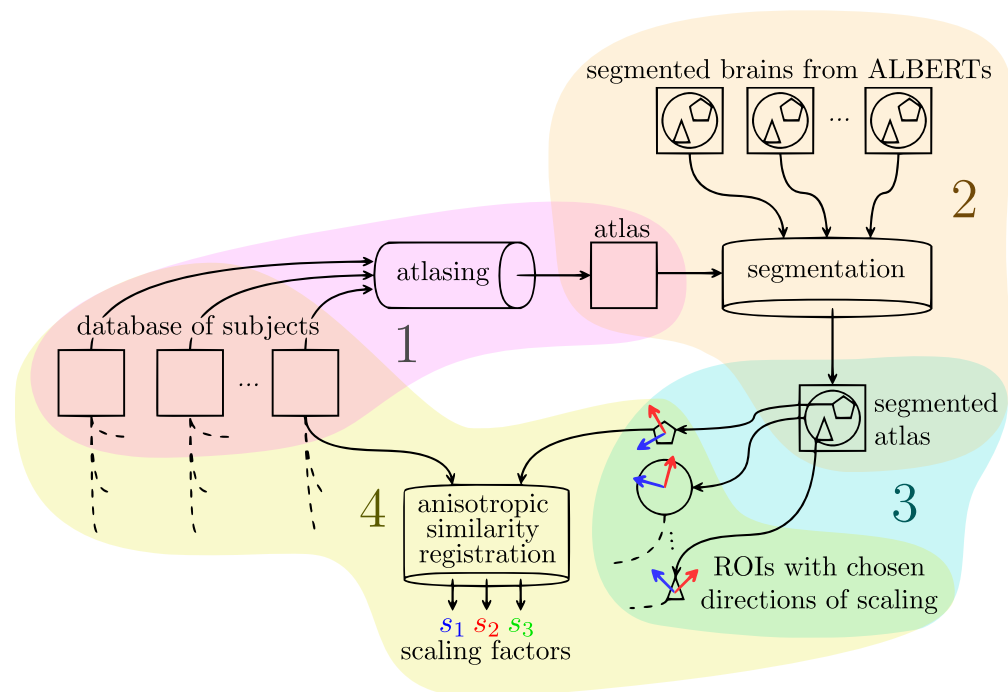

**Fig 3.** Pipeline for the extraction of scaling factors of a database of subjects using anisotropic similarity registration onto an atlas based on them as common reference image

<sup>2</sup>Anima-Script: [github.com/Inria-Visages/Anima-Scripts-Public/](https://github.com/Inria-Visages/Anima-Scripts-Public/)

### 3.2.2 Segmentation of the common reference image

The atlas has then been segmented into 21 regions of interest (ROIs): whole brain, hemispheres, frontal lobe, parietal lobe, temporal lobe, occipital lobe, basal ganglia, cerebellum, insula, ventricles, corpus callosum and brainstem. All structures were also separated in their left and right sides. To do this segmentation, ALBERT's manual ones ([36] and [37], see acknowledgments 6.1.4) have been used: 20 brains segmented into 50 regions manually drawn based on MRI brain scans that we fused to obtain the wider desired regions. The T1 weighted images of those brains have been registered onto our atlas through affine then diffeomorphic registration. The outputs have then been used to transfer all the segmentations onto our atlas which have been then merged using majority voting following [38]. The segmented atlas is shown Figure 4.

### 3.2.3 Choice of the constrained directions of scaling

The fixed scaling directions (characterized by the column vectors of the matrix  $U$ ) are chosen on the reference image such that the first direction (blue in figure 4) is orthogonal to the mid-sagittal plane (determined using [39]) for symmetry reasons. The others two directions are set using principal component analysis (PCA) on the non zero voxels coordinates projected onto the mid-sagittal plane. The second direction (red in figure 4) corresponds to the principal direction from the PCA while the third (green in figure 4) corresponds to the secondary one. 3 orthogonal directions are now chosen: one through iconic considerations and the other ones based on purely geometrical features. In our application, the matrix  $U$  is the same for all ROIs of the reference image and is defined using the whole brain. However, it is possible to define a different  $U$  for each ROI independently. Chosen directions of scaling are shown Figure 4.

### 3.2.4 Anisotropic similarity registration

For each ROI, all subjects undergo an anisotropic similarity registration onto the reference image masked by this ROI. This registration is performed in two steps using in each case our block matching algorithm implemented in Anima<sup>3</sup>:

1. A similarity from whole brain subjects onto whole brain common reference is first

<sup>3</sup>Anima: [github.com/Inria-Visages/Anima-Public/](https://github.com/Inria-Visages/Anima-Public/)

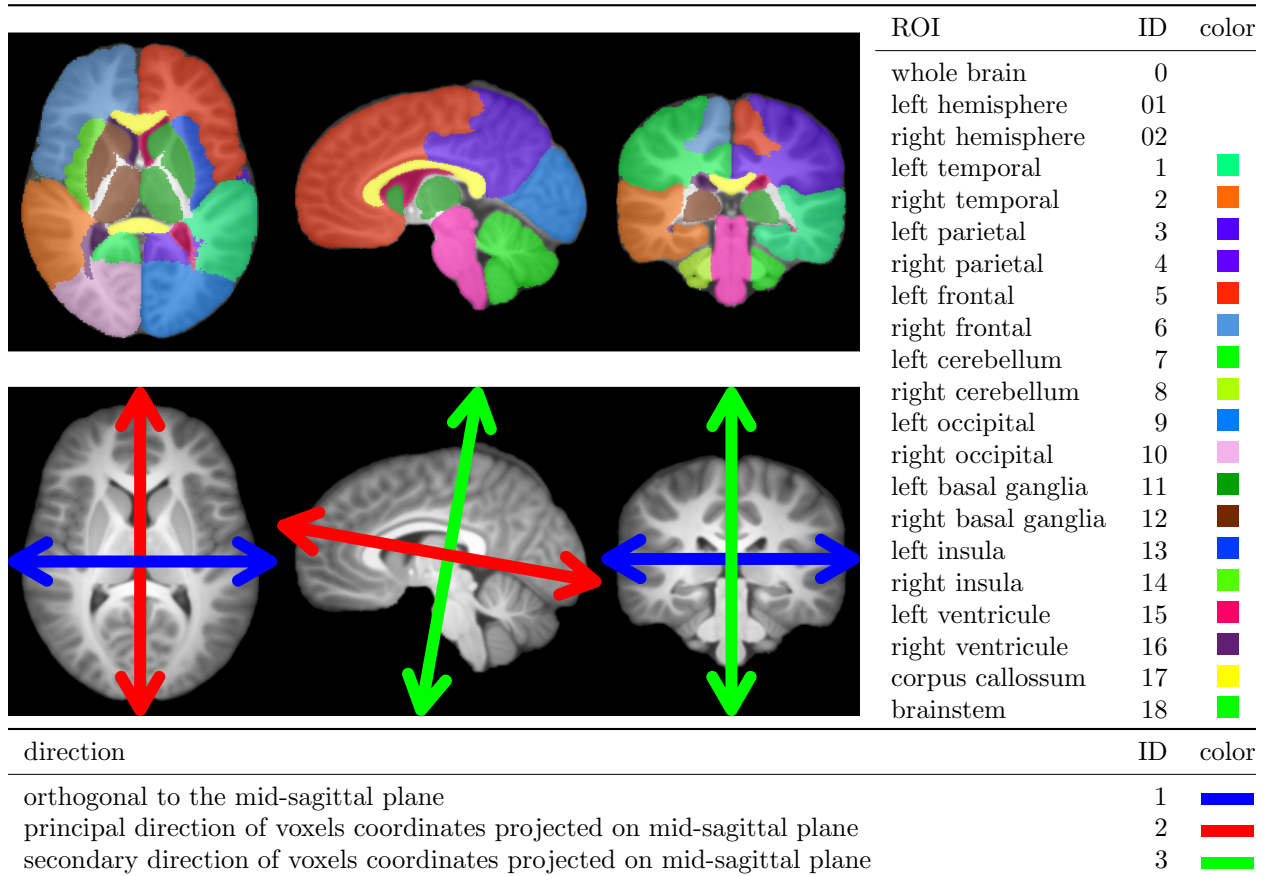

**Fig 4.** Regions of interest (ROIs) segmented and represented on the common reference image (top), chosen directions of scaling for anisotropic similarity registration defined and represented on the common reference image (bottom)

estimated. 217

- An anisotropic similarity initialized from the previous step output is then 218  
 computed to bring the subjects onto the atlas masked by the current ROI. 219

The first transformation, a similarity, is computed indirectly during a process of 220  
 affine registration. Let  $A$  be the linear part of an affine transformation  $T_A$ . We consider 221  
 the following SVD:  $A = VDW^T$  with  $D$  diagonal positive,  $V$  and  $W$  unitary matrices. 222  
 We define  $T_B$  (the nearest similarity associated to  $T_A$ ) as the transformation with linear 223  
 part  $B = \bar{d}VW^T$  with  $\bar{d}$  being the average of the singular values namely the mean of 224  
 the diagonal of  $D$ , and translation part  $t = \bar{y} - B\bar{x}$ . We chose the initialization to be a 225  
 similarity since the composition of a similarity  $T_B$  and an anisotropic similarity  $T_C$  226  
 associated to a matrix  $U$  is still an anisotropic similarity associated to the same  $U$ : 227  
 $T_B T_C = (s_B R_B)(R_C S_C U^T) = (R_B R_C)(s_B S_C) U^T = R S U^T$ . 228

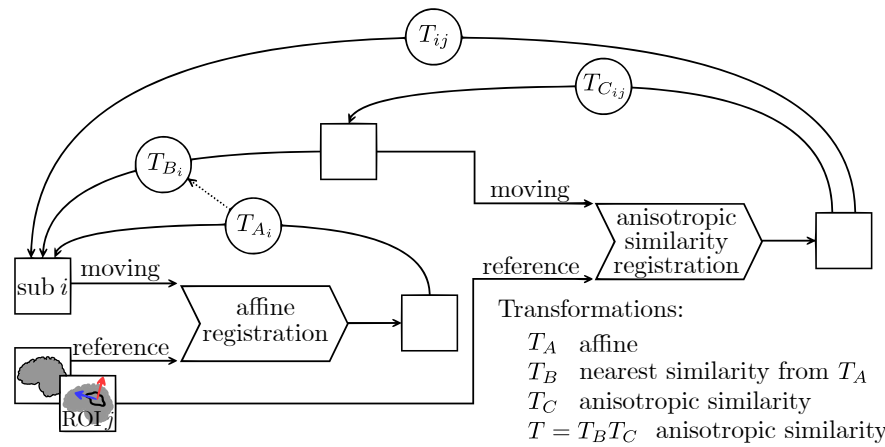

**Fig 5.** Two steps registration process: first an affine from which a nearest similarity is deduced, then an anisotropic similarity

**Remark.** Transformations are composed and represented with arrows from destination 229  
to start since the interpolations occurring in the resampling process are done using the 230  
backward mapping. The inverse transformation is actually used on each voxel of the 231  
output images to determine the position in the input image from which a value is 232  
sampled. 233

### 3.2.5 Extraction of absolute scaling factors 234

From the output transformations of the registration step, the relative scaling parameters 235  
along the three fixed directions are extracted. A normalization is then applied such that 236  
the scalings at age 0 are close to 1. To this end, the fact that all dHCP subjects are 237  
very young (less than 1 month) is exploited. All relative scaling factors are divided by 238  
the average of the ones associated to the dHCP subjects considered as the “root” of the 239  
brain expansion. Those new scaling factors will now be considered as absolute scaling 240  
factors. At this stage, for each subject, an absolute scaling factor has been determined 241  
for each ROI. Those absolute scaling factors are used to model the expansion of the 242  
brain toward the chosen directions. 243

## 4 Experiments and results

### 4.1 Model selection

Several models are traditionally used to represent growth in biostatistics such as the exponential or Weibull models. The second one has been considered by [24] as the best suited to model brain growth in terms of volume. Our case however is different: it can be viewed as a 3-way unidimensional approach. In our quest to find the function best suited to model growth curves for our data, we decided to consider, as a prior, that the brain expansion is stopping at some point. Therefore, we restricted the spectrum to functions that have an horizontal asymptote at infinity. The selected candidates to model brain growth in the chosen directions are the following:

- Rational with polynomials of degree 1 as numerator and denominator :

$$y = \frac{ax + b}{x + c}$$

- Weibull:  $y = a - be^{-cx^d}$

- Gompertz:  $y = ae^{-be^{-cx}}$

- Exponential:  $y = a + be^{-cx}$

For each candidate, the optimal coefficients are estimated through nonlinear regression using the Levenberg-Marquardt iterative weighted least squares algorithm from [40]. In this process, weights are chosen to compensate for local gender repartition. For each subject  $i$ , a window of width  $l = 2$  years centered on the subject age is considered. Let  $n_f$ ,  $n_m$  and  $n$  be the number of female, male and total subjects respectively in that window. A correction coefficient  $c_f = \frac{n_m}{n}$  is applied if  $i$  is a female and  $c_m = \frac{n_f}{n}$  if  $i$  is a male. Let  $\{y_1, \dots, y_n\}$  be the observations (i.e. here the obtained scaling factors),  $\bar{y}$  be the average of those and  $\{\hat{y}_1, \dots, \hat{y}_n\}$  be the fitted values.

Based on these statistics, the chosen candidate for the modeling will be the one that best satisfies a criterion quantifying the goodness of fit. This indicator should evaluate the accuracy of the model i.e. how close the model is to the observation while discouraging overfitting. It therefore consists in a tradeoff between accuracy and parsimony. It has been shown in [41] that the coefficient of determination is not, at least when considered alone, an appropriate measure for the goodness of fit in the case

of nonlinear model selection. A more adapted goodness of fit for nonlinear model selection is the Akaike information criterion (AIC) developed in [42] and [43]. Based on information theory, it proposes to estimate the information loss induced by each candidate model to represent an unknown process that supposedly generated the data as shown in [44]. This is made possible through the estimation of the Kullback-Leibler divergence related to the maximized log-likelihood. AIC is defined by:

$AIC = -2p - 2\ln(\hat{L})$ , where  $\hat{L}$  is the maximum likelihood of the candidate model and the first term penalizes a large number of parameters  $p$ . Therefore, the preferred model among the candidates is the one with the lower AIC. Note that AIC of a model taken alone is meaningless, it makes sense only when compared to the one of the other models.

This is why it is recommended to consider it along with an other statistic that quantifies the error between the model and the data like mean of squared errors (MSE):

$MSE = \frac{1}{n} \sum_i (y_i - \hat{y}_i)^2$  which is the average of the residuals. A corrected version of the AIC has been developed to avoid overfitting in the case of small sample sizes:

$AIC_c = AIC + \frac{2p(2p+1)}{n-p-1}$ . To facilitate the interpretation that can be quite obscure using raw AIC, following [45], it is possible to transform those values into conditional

probabilities for each model called Akaike weights. Defined for each model  $i$  by  $w_{i,AIC} = \frac{e^{-\frac{1}{2}(AIC_i - AIC_{min})}}{\sum_j e^{-\frac{1}{2}(AIC_j - AIC_{min})}}$ , those weights represent the probability for each candidate  $i$  to be the best suited in the sense of AIC to model the data among all the candidates.

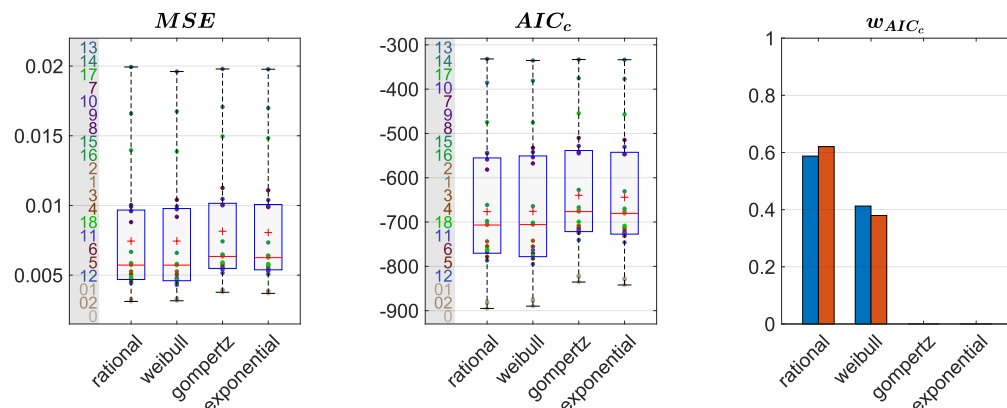

**Fig 6.** Goodness of fits for each candidate to model the outputted scaling factors averaged in the 3 directions. Boxplots are performed along the ROIs, ROI IDs are displayed on the left. Akaike weights are computed on mean (blue) and median (red)  $AIC_c$

All the goodness of fit depicted above as well as MSE have been evaluated for each of our candidates to model the scaling factors for each ROI. We present the results of this evaluation Figure 6. The Gompertz and exponential models are largely below the other two. Even though the Weibull model behaves relatively well, the rational one shows better scores whatever the tested goodness of fit.

## 4.2 Directional growth curves

From the previous sections, scaling factors in each direction for each ROI are now modeled using a rational function with polynomials of degree 1 as numerator and denominator chosen after model selection. Results for all regions studied are presented in figure 7. The method presented by [46] is used to compute simultaneous 99% confidence intervals for fitted values. The black curve represents the average brain growth computed as the mean of the directional models (Figure 7).

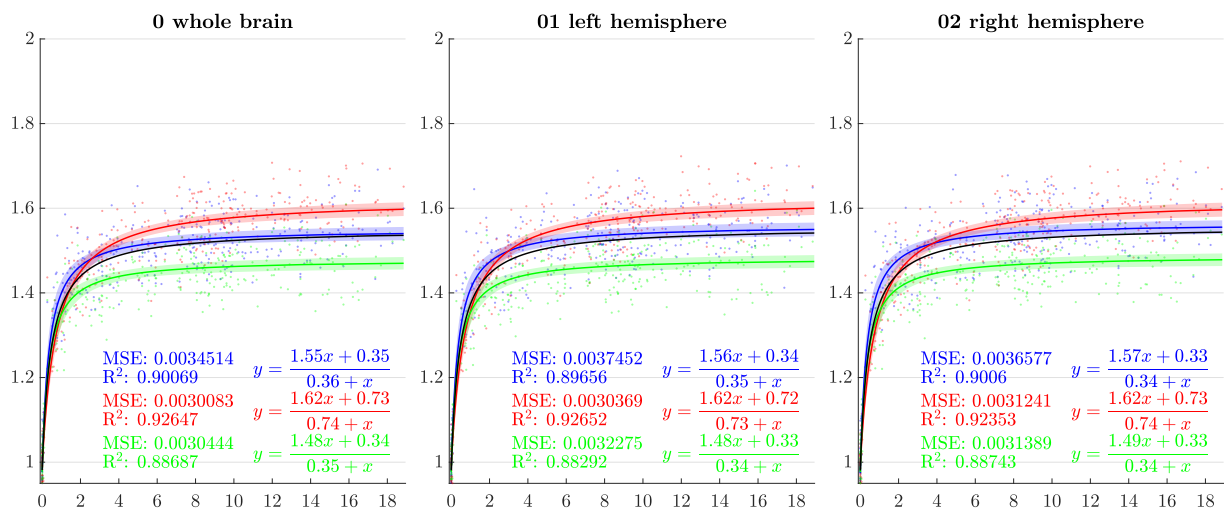



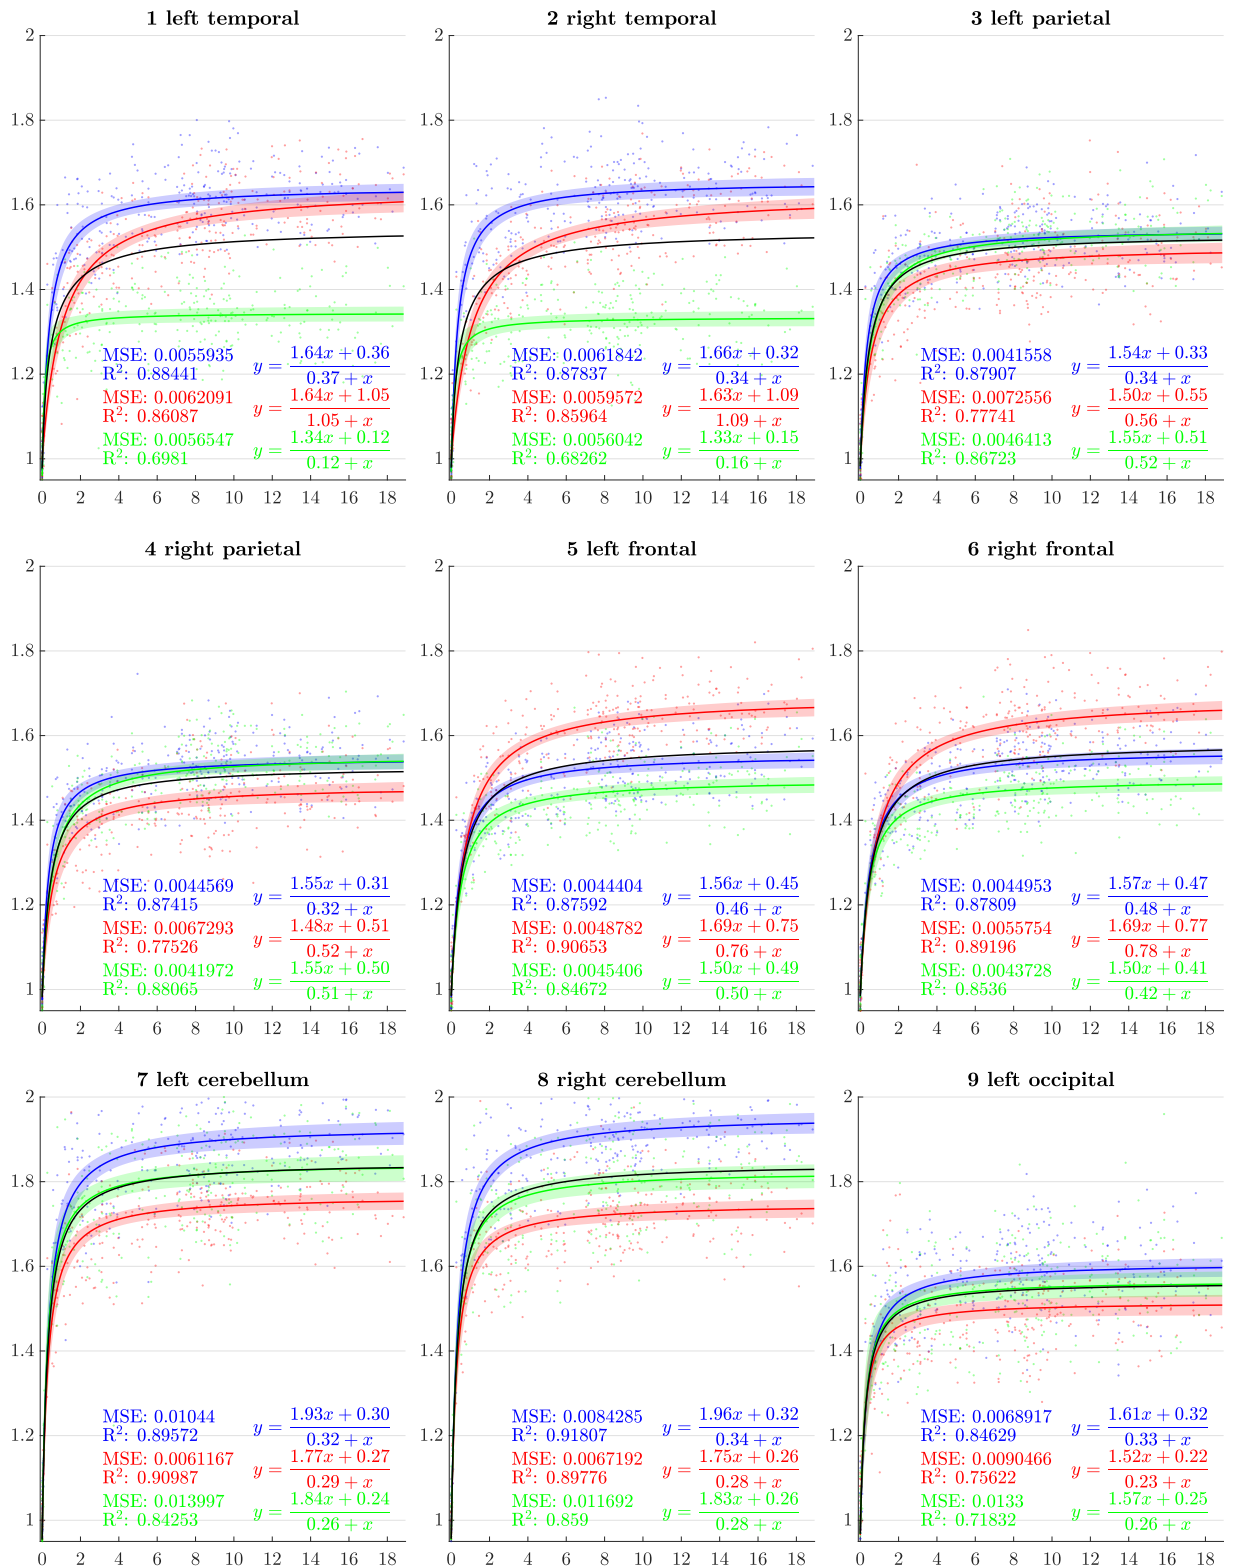

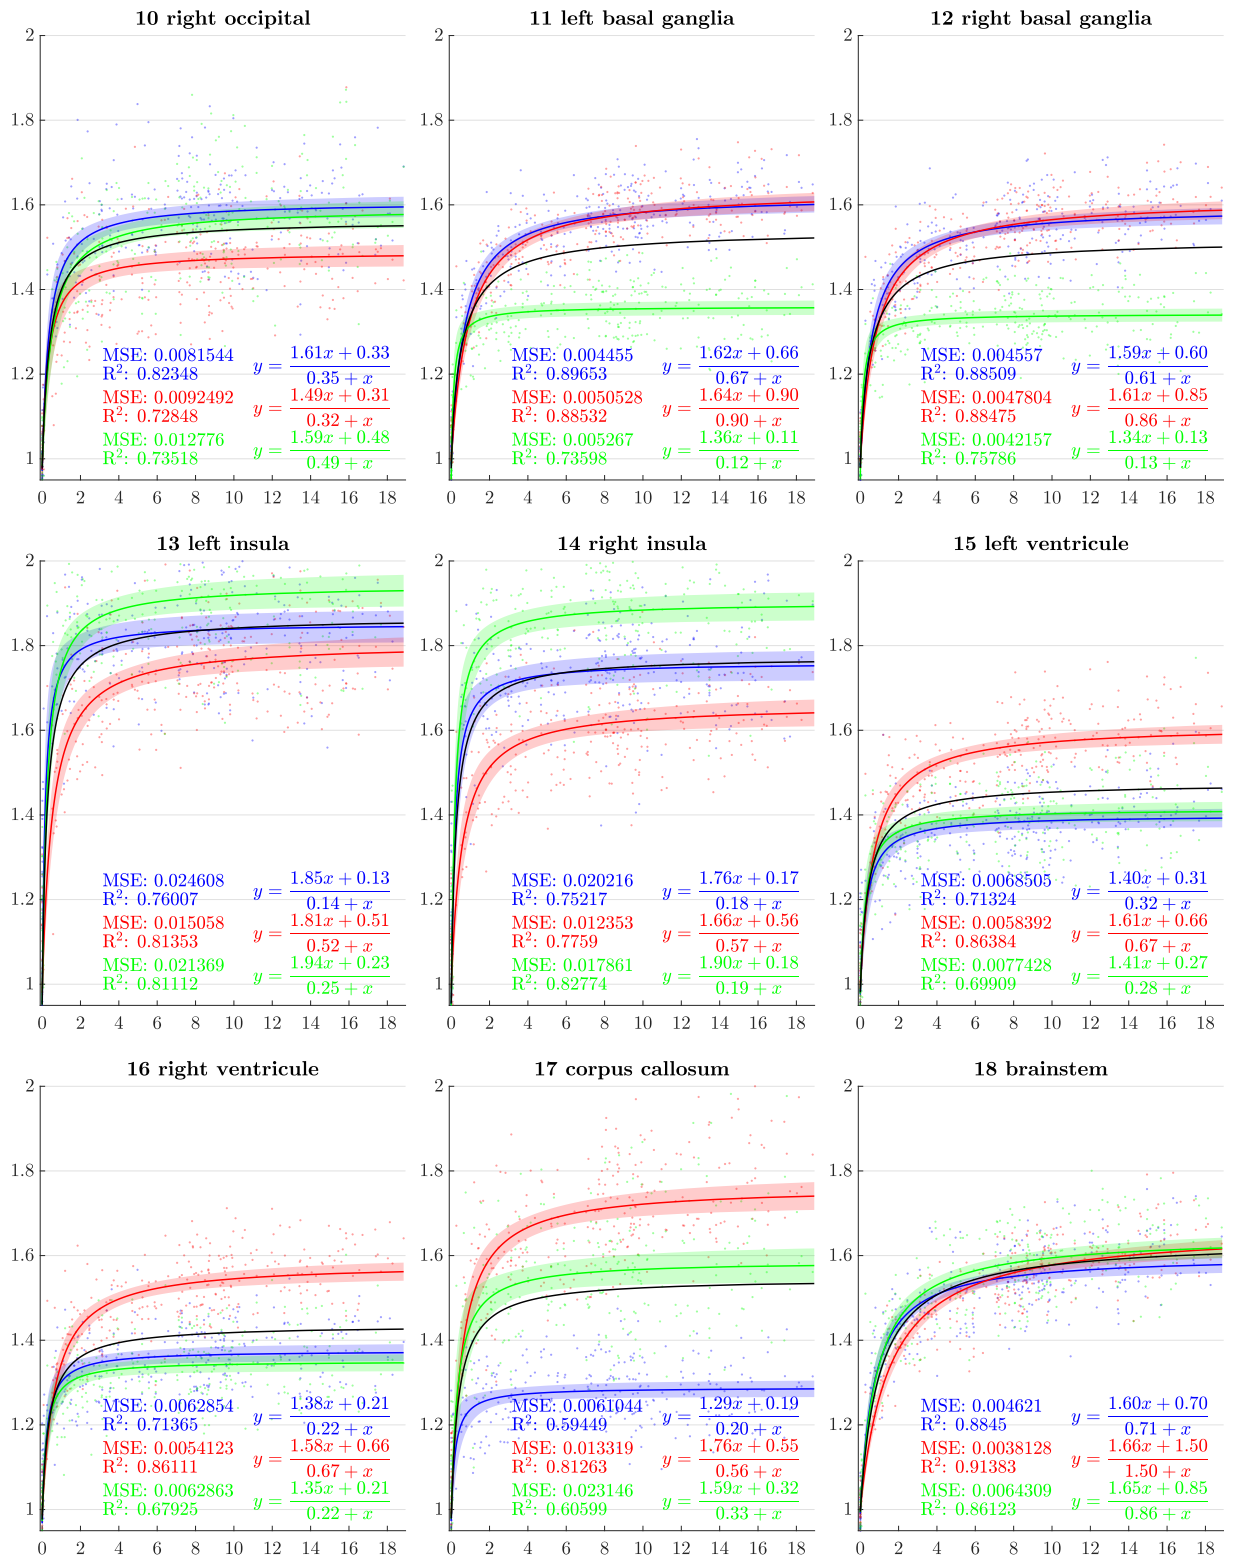

**Fig 7.** Resulting scaling factors as a function of the age for different ROIs, along direction 1 (blue), 2 (red), 3 (green). Fitted using rational model together with 99% confidence intervals for fitted values.

### 4.3 Male vs female comparison

Gender, like age, is a characteristic of the subjects available in all the studies we considered. The aim of this section is to evaluate if differences in terms of scaling factor can be found between genders. We divided our data into four classes based on the age of the subjects. The first one contains dHCP participants (newborns), the second one is composed of all non-newborn subjects between 0 and 6 years old, the third one between 6 and 12 and the fourth superior to 12 years old. Repartition of the subjects in terms of gender, age class and study is shown Table 1.

|        |          | dHCP | ]0, 6] |    | ]6, 12] |    | > 12 |    |     |    |
|--------|----------|------|--------|----|---------|----|------|----|-----|----|
| male   | dHCP     | 22   | 0      |    | 0       |    | 0    |    | 147 |    |
|        | c-mind   | 22   | 0      | 51 | 29      | 48 | 37   | 26 |     | 24 |
|        | ASLpedia | 0    |        | 22 |         | 11 |      | 2  |     |    |
| female | dHCP     | 15   | 0      |    | 0       |    | 0    |    | 161 |    |
|        | c-mind   | 15   | 0      | 54 | 43      | 57 | 43   | 35 |     | 21 |
|        | ASLpedia | 0    |        | 11 |         | 14 |      | 14 |     |    |
|        |          | 37   | 105    |    | 105     |    | 61   |    | 308 |    |

**Table 1.** Repartition of the subjects in term of age class, gender and study

For each of these classes, and each of the chosen scaling directions, and each ROI, we performed a test to evaluate if the scaling factors for male subjects are greater than scaling factors for female subjects. Since these data are not normally distributed in those subdivisions, we used two-tailed Wilcoxon-Man-Whitney U-tests. For each of those tests, the null hypothesis  $H_0$  is the following: the distribution of the scaling factors between males and females are equal, while the alternative hypothesis  $H_1$  states: the distributions of males and females are different. We performed 252 tests in total: 4 age classes  $\times$  21 ROIs  $\times$  3 directions whose results are shown figure 8.

A type 1 error, or false positive, occurs when  $H_0$  is incorrectly rejected. Since we are doing multiple comparisons, rejecting  $H_0$  based on the risk of type 1 error  $\alpha = 5\%$ , may lead in our case to an expected number of false positives superior to 12. Instead of using  $\alpha$ , we therefore adopted the false discovery rate (FDR) that controls the proportion of false positives among the tests where  $H_0$  has been rejected. Therefore, we stated the acceptance or rejection of  $H_0$  based on a FDR at level 5%. This has been done using Benjamini and Hochberg procedure from [47] and corresponds to reject  $H_0$  when the p-value is less than 0.0077 (Figure 8). FDR has been preferred to family-wise error rate

(FWER), that controls the risk of at least 1 false positive among the whole family of tests, because of the over-conservatism of this last type of procedure leading to poor test power (probability of correctly rejecting  $H_0$ ). Additionally, we calculated, for each test, the effect size  $d$  following:  $d = \frac{\text{median}(\{S_m\}) - \text{median}(\{S_f\})}{\sigma(\{S_m\}) + \sigma(\{S_f\})}$  (Figure 8), where  $\{S_m\}$  (resp.  $\{S_f\}$ ) is the set of scaling factor of males (resp. females) used for the test. We preferred the use of median instead of mean due to the fact that we do not know the distribution of the data a priori and we performed ranksum type tests.

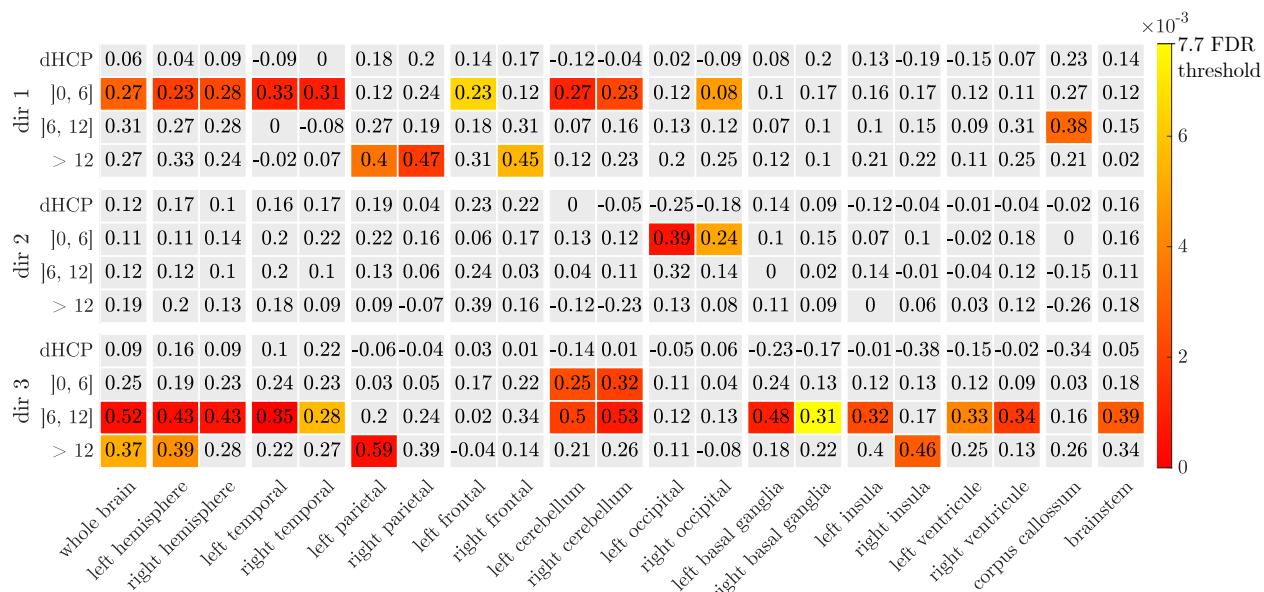

**Fig 8.** Male vs female comparison using Wilcoxon-Man-Whitney U-test and  $H_0$ : the distribution of the scaling factors of males and females are equal,  $H_1$ : the distributions of males and females are different. In color: p-values for  $H_0$  rejection for FDR at level 5% (Benjamini and Hochberg method). Numerically: the size of the effect  $d$  for each test.

For all the tests that lead to a rejection of the null hypothesis, scaling factors were higher for males both in terms of means and medians. Tests show that scaling factors of males seem higher in the second age class (0-6), brainwise and mainly in temporal and cerebellum areas along the direction 1. This is also notable in the same regions between 6 and 12 years, this time along direction 3. For the older class (12-19), this phenomenon essentially appears brainwise along the direction 3 and in the parietal lobes along direction 1.

#### 4.4 Influence of the common reference

To evaluate the influence of the common reference image, the whole process described previously is reproduced using six different reference images. Those are atlases for different time-points  $t_1, \dots, t_6$  based on the previously depicted population. Atlas for time  $t_i$  is created using subjects with ages close to  $t_i$  weighted according to their temporal distance to  $t_i$  using kernel regression. Time-points are chosen such that five of them cover the period in which the majority of the brain expansion occurs, the last is positioned later, in a stabilized area (Figure 9).

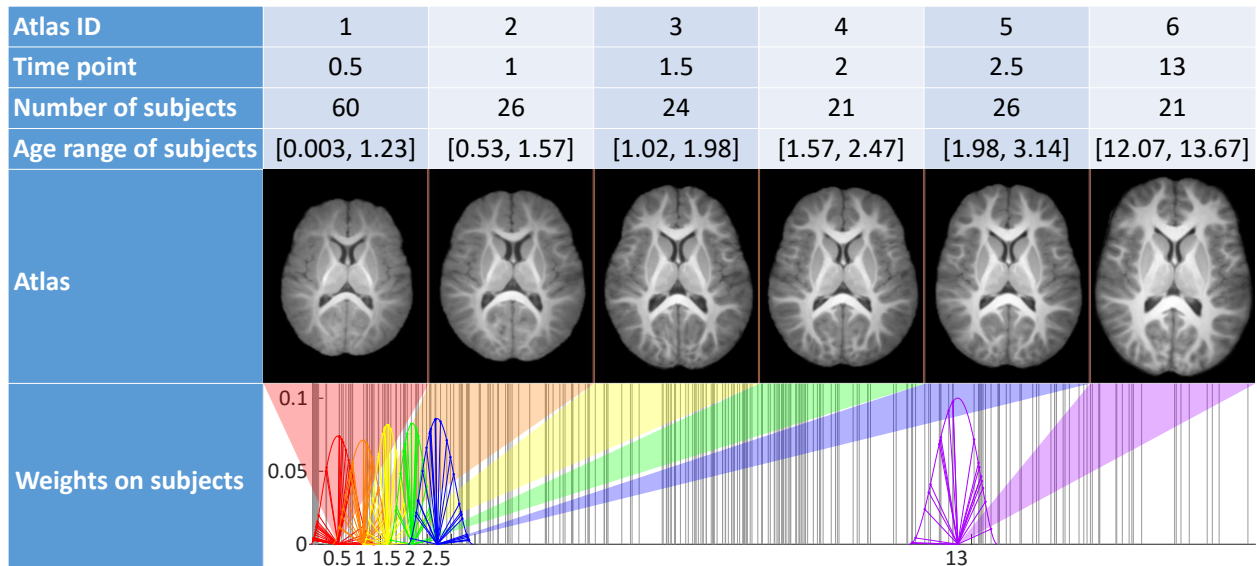

**Fig 9.** Characteristics of the 6 atlases used as reference image (time is displayed in years).

The method developed in section 3.2 is used for each of these reference images, on which directions of scaling for the anisotropic similarity registration have been established the same way. A scaling factor  $s(i, j, d, k)$  is thus computed for each ROI  $j$  of each subject  $i$  based on each reference image  $k$  along each chosen direction  $d$ . To quantify the influence of the reference image on absolute scaling factors, the results, using the six reference images previously depicted, are compared through two approaches:

1. A pairwise study to evaluate whether or not reference atlases closer to each other in age are more likely to generate closer results.
2. A study of the standard deviation among results for all reference atlases to

evaluate how far they are from the average results.

#### 4.4.1 Study of pairwise distances between scaling factors by reference images in each direction for each ROI

Our aim is to determine whether or not reference images closer to each other (atlases at shorter temporal distances) are more likely to generate less important absolute differences between their results. We therefore to compute the absolute difference of the resulting scaling factors between each pairwise combinations of reference images. Then, those distances are normalized by the average of corresponding scaling factors between the two atlases such that it can be seen as a percentage of it (relative distance). The relative distance between scaling factors from reference atlases  $k$  and  $l$  is then computed as:

$$D_{k,l}(i, j, d) = 2 \frac{|s(i, j, d, k) - s(i, j, d, l)|}{s(i, j, d, k) + s(i, j, d, l)} \quad (15)$$

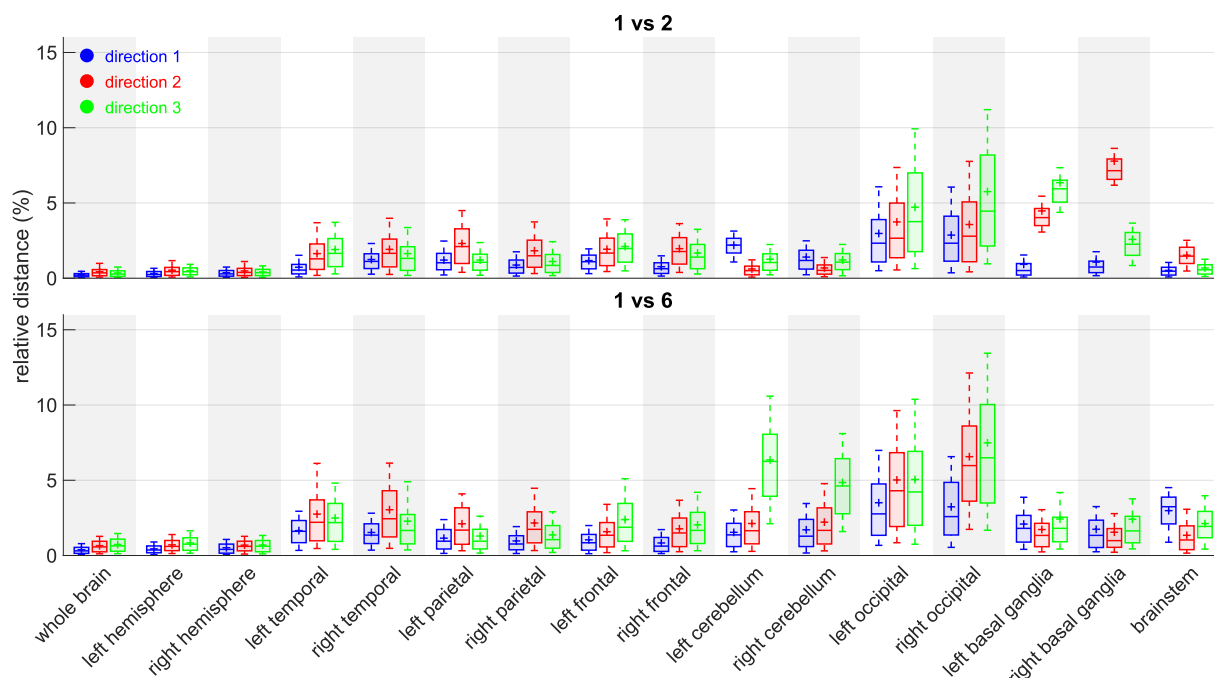

**Fig 10.** Relative distances between reference atlas 1 and 2 (top), 1 and 6 (bottom). Boxplots among subjects for each ROI  $j$ , each direction  $d$ :  $\text{boxplot}(D_{k,l}(\cdot, j, d))$ .

After examination of all the pairwise combinations, the temporal distance between the reference images does not seem to have an impact on the distance of the scaling ratios associated to each other (figure 10). The highest median of relative distance

happens to be between atlases 2 and 5 for right basal ganglia, but does go above reach 8% of difference.

#### 4.4.2 Study of the standard deviation among reference images in each direction for each ROI

This method gives an average measure of the distances between the results for each atlas and the average results. Those distances are normalized by the average of corresponding scaling factors of all the atlases. The relative standard deviation between scaling from all reference atlases is then computed as:

$$D(i, j, d) = \frac{\sigma(s(i, j, d, \cdot))}{s(i, j, d, \cdot)} \quad (16)$$

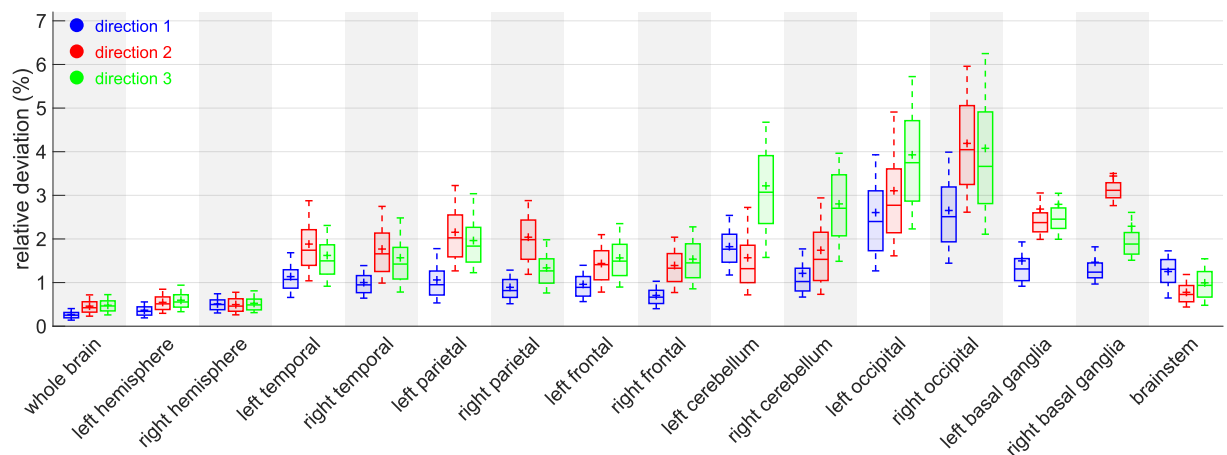

**Fig 11.** Relative standard deviation between reference atlases. Boxplots among subjects for each ROI  $j$ , each direction  $d$ :  $\text{boxplot}(D(\cdot, j, d))$ .

The graphs (figure 11) suggest that the method, when applied to large regions such as whole brain and hemispheres, is really robust to reference image change. Occipital lobes and cerebellum however seem to be more vulnerable areas. Those two regions share a common border and we believe that the segmentation process is a crucial step in that case. The cerebellum position indeed varies quickly in early stages of life and our decision to use segmentations based on neonates can be a bit inadequate for this area in particular. We also think that the way we chose to define the constrained directions of scaling (especially those using purely geometrical considerations through PCA on voxel

coordinates) may not be the best suited for robustness in those areas. More anatomical  
features could lead to even smaller influence of the reference image.

## 5 Discussion

The choice of the scaling directions, characterized by the matrix  $U$ , is crucial. If our  
decision to pick a vector orthogonal to the mid-sagittal plane seems meaningful due to  
symmetry reasons, the selection of the other two could be more debatable since they are  
based on purely geometric features ignoring iconic or anatomical considerations. A more  
anatomically-oriented approach could be to ask a medical expert to point, on the  
reference image, the anterior commissure - posterior commissure (AC-PC) line. This has  
been well adopted as a standard by the clinical neuroimaging community even though it  
is mostly a convention for visualization and at the cost of introducing a human  
interaction or a preprocessing step. There is no absolute good choice though and this  
choice depends on the purpose of the study. It is also possible to define specific  
directions for each ROI that could bring additional information for further studies. This  
method is therefore very flexible in the choice of the scaling directions and the ROIs, yet  
it has shown oneself robust concerning the choice of the common reference image.

We focused on the expansion of structures of a database of healthy subjects but we  
can also imagine using this method for patients. Intra-individual surveys are also  
possible, for subjects that had multiple scans through time, to monitor the evolution of  
a brain sub-region or any part of the body and infer the way it is going to expand.

Finally, although it does not call into question the method itself, there is room for  
improvements in the way we segmented the ROIs. The main difficulty is to find a  
method that is reproducible while being adaptable to brains from subjects scanned  
across a wide range of ages, which induces a large variability in contrast and shape.

## Conclusion

We have presented a method that allows the extraction of regional and global scaling  
factors along arbitrary chosen orthogonal directions. This is done through linear  
registration using a 9 dof transformation, anisotropic similarity, which is an affine



transformation with constrained directions of scaling. 420

The main methodological contribution of this paper concerns the resolution of the 421  
problem of finding the optimal anisotropic similarity that best matches two sets of 422  
paired points. This result has made possible the development of a block-matching 423  
registration algorithm based on this transformation. 424

Given this new type of registration, our second contribution was to map a database 425  
of subjects between 0 and 19 years old using anisotropic similarity onto a common 426  
reference image on which the constrained directions of scaling of our choosing have been 427  
fixed. Registrations have been performed brainwise and ROI wise (lobes, cerebellum, 428  
basal ganglia...). For genericity purpose, we chose this reference image to be an atlas 429  
made from the subjects. Based on symmetry and geometrical considerations, we defined 430  
the same constrained directions of scaling for all ROIs even though it is possible to 431  
choose different ones for each. As an output, we obtained for each subject, for each ROI, 432  
for each chosen direction a scaling, a scaling factor that we normalized such that it 433  
represents an expansion factor from birth. 434

Those scaling factors have been used to model the anisotropic development of the 435  
brain. After model selection, it has been determined that rational function with 436  
polynomials of degree 1 as numerator and denominator is the best suited among the 437  
tested candidates for that modeling. Curves representing scaling factors as a function of 438  
the age for each ROIs, each chosen direction, along with associated confidence intervals 439  
have then been computed on a combination of four databases. 440

Tests to determine the influence of gender in those scaling factors have been 441  
performed for different age classes. Finally, two experiments have been conducted to 442  
evaluate the influence of the aforementioned common reference image. The results have 443  
shown small relative differences depending on the choice of the reference image leading 444  
to the conclusion that the method is robust in that aspect. 445

## 6 Acknowledgments 446

### 6.1 Databases 447

#### 6.1.1 ASLpedia 448

A retrospective ASL study on routine pediatric MRI performed at Rennes University Hospital Neuropediatric radiology Department. 449  
450

#### 6.1.2 C-MIND 451

Data Repository created by the C-MIND study of Normal Brain Development. This is a multisite, longitudinal study of typically developing children from ages newborn through young adulthood conducted by Cincinnati Children's Hospital Medical Center and UCLA and supported by the National Institute of Child Health and Human Development (Contract HHSN275200900018C). A listing of the participating sites and a complete listing of the study investigators can be found at: 452  
453  
454  
455  
456  
457

<https://research.cchmc.org/c-mind>. 458

#### 6.1.3 The Developing Human Connectome Project (dHCP) 459

Led by King's College London, Imperial College London and Oxford University, aims to make major scientific progress by creating the first 4-dimensional connectome of early life. 460  
461  
462

<https://data.developingconnectome.org/> 463

#### 6.1.4 ALBERTs 464

See [36] and [37] for details about segmentations. Copyright Imperial College of Science, Technology and Medicine and Ioannis S. Gousias 2013. All rights reserved. 465  
466

<http://brain-development.org/brain-atlases/neonatal-brain-atlas-albert/> 467

### 6.2 Funding 468

The research leading to these results has been supported by the ANR MAIA project, grant ANR-15-CE23-0009 of the French National Research Agency 469  
470  
(<http://recherche.imt-atlantique.fr/maia>) and La Région Bretagne. 471

## References

1. Giorgio A, De Stefano N. Clinical use of brain volumetry. *Journal of Magnetic Resonance Imaging*. 2013;37(1):1–14. doi:10.1002/jmri.23671.
2. Aylward EH, Schwartz J, Machlin S, Pearlson G. Bicaudate ratio as a measure of caudate volume on MR images. *American Journal of Neuroradiology*. 1991;12(6):1217–1222.
3. Bermel RA, Bakshi R, Tjoa C, Puli SR, Jacobs L. Bicaudate ratio as a magnetic resonance imaging marker of brain atrophy in multiple sclerosis. *Archives of Neurology*. 2002;59(2):275–280. doi:10.1001/archneur.59.2.275.
4. Nguyen The Tich S, Anderson PJ, Hunt RW, Lee KJ, Doyle LW, Inder TE. Neurodevelopmental and perinatal correlates of simple brain metrics in very preterm infants. *Archives of Pediatrics and Adolescent Medicine*. 2011;165(3):216–222. doi:10.1001/archpediatrics.2011.9.
5. Winkler AM, Sabuncu MR, Yeo BTT, Fischl B, Greve DN, Kochunov P, et al. Measuring and comparing brain cortical surface area and other areal quantities. *NeuroImage*. 2012;61(4):1428–1443. doi:10.1016/j.neuroimage.2012.03.026.
6. Giedd JN, Rapoport JL. Structural MRI of Pediatric Brain Development: What Have We Learned and Where Are We Going? *Neuron*. 2010;67(5):728–734. doi:10.1016/j.neuron.2010.08.040.
7. Hamano K, Iwasaki N, Kawashima K, Takita H. Volumetric quantification of brain volume in children using sequential CT scans. *Neuroradiology*. 1990;32(4):300–303. doi:10.1007/BF00593049.
8. Pfefferbaum A, Mathalon DH, Sullivan EV, Rawles JM, Zipursky RB, Lim KO. A Quantitative Magnetic Resonance Imaging Study of Changes in Brain Morphology From Infancy to Late Adulthood; 1994.
9. Reiss AL, Abrams MT, Singer HS, Ross JL, Denckla MB. Brain development, gender and IQ in children. A volumetric imaging study. *Brain : a journal of neurology*. 1996;119 ( Pt 5):1763–74. doi:10.1093/brain/119.5.1763.

10. Matsumae M, Kikinis R, Mórocz IA, Lorenzo AV, Sándor T, Albert MS, et al. Age-related changes in intracranial compartment volumes in normal adults assessed by magnetic resonance imaging. *Journal of Neurosurgery*. 1996;84(6):982–991. doi:10.3171/jns.1996.84.6.0982.
11. Murphy DG, DeCarli C, McIntosh AR, Daly E, Mentis MJ, Pietrini P, et al. Sex differences in human brain morphometry and metabolism: an in vivo quantitative magnetic resonance imaging and positron emission tomography study on the effect of aging. *Archives of general psychiatry*. 1996;53(7):585–94. doi:10.1001/archpsyc.1996.01830070031007.
12. Iwasaki N, Hamano K, Okada Y, Horigome Y, Nakayama J, Takeya T, et al. Volumetric quantification of brain development using MRI. *Neuroradiology*. 1997;39(12):841–846. doi:10.1007/s002340050517.
13. Hüppi PS, Warfield S, Kikinis R, Barnes PD, Zientara GP, Jolesz Fa, et al. Quantitative magnetic resonance imaging of brain development in premature and mature newborns. *Annals of neurology*. 1998;43(2):224–235. doi:10.1002/ana.410430213.
14. Coffey CE. Sex Differences in Brain Aging. *Arch Neurol*. 1998;doi:10.1002/9780470015902.a0022344.
15. Giedd JN, Blumenthal J, Jeffries NO, Castellanos FX, Liu H, Zijdenbos A, et al. Brain development during childhood and adolescence: a longitudinal MRI study. *Nature Neuroscience*. 1999;2(10):861–863. doi:10.1038/13158.
16. Utsunomiya H, Takano K, Okazaki M, Mitsudome A. Development of the temporal lobe in infants and children: Analysis by MR-based volumetry. *American Journal of Neuroradiology*. 1999;20(4):717–723.
17. Courchesne E, Chisum HJ, Townsend J, Cowles A, Covington J, Egaas B, et al. Normal Brain Development and Aging: Quantitative Analysis at in Vivo MR Imaging in Healthy Volunteers. *Radiology*. 2000;216(3):672–682. doi:10.1148/radiology.216.3.r00au37672.

18. Gousias IS, Rueckert D, Heckemann RA, Dyet LE, Boardman JP, Edwards AD, et al. Automatic segmentation of brain MRIs of 2-year-olds into 83 regions of interest. *NeuroImage*. 2008;40(2):672–684. doi:10.1016/j.neuroimage.2007.11.034.
19. Knickmeyer RC, Gouttard S, Kang C, Evans D, Smith JK, Hamer RM, et al. A Structural MRI Study of Human Brain Development from Birth to 2 Years. *Journal of Neuroscience*. 2010;28(47):12176–12182. doi:10.1523/JNEUROSCI.3479-08.2008.A.
20. Kuklisova-Murgasova M, Aljabar P, Srinivasan L, Counsell SJ, Doria V, Serag A, et al. A dynamic 4D probabilistic atlas of the developing brain. *NeuroImage*. 2011;doi:10.1016/j.neuroimage.2010.10.019.
21. Lange N. Total and regional brain volumes in a population-based normative sample from 4 to 18 years: The NIH MRI study of normal brain development. *Cerebral Cortex*. 2012;22(1):1–12. doi:10.1093/cercor/bhr018.
22. Choe Ms, Ortiz-Mantilla S, Makris N, Gregas M, Bacic J, Haehn D, et al. Regional Infant Brain Development: An MRI-Based Morphometric Analysis in 3 to 13 Month Olds. *Cerebral Cortex*. 2013;23(9):2100–2117. doi:10.1093/cercor/bhs197.
23. Makropoulos A, Aljabar P, Wright R, Hüning B, Merchant N, Arichi T, et al. Regional growth and atlas of the developing human brain. *NeuroImage*. 2016;125:456–478. doi:10.1016/j.neuroimage.2015.10.047.
24. Peterson M, Warf BC, Schiff SJ. Normative human brain volume growth. *Journal of Neurosurgery: Pediatrics*. 2018;21(May):1–8. doi:10.3171/2017.10.PEDS17141.
25. Wells WM, Viola P, Atsumi H, Nakajima S, Kikinis R. Multi-Modal Volume Registration by Maximisation of Mutual Information. *Medical Image Analysis*. 1996;.
26. Maes F, Collignon A, Vandermeulen D, Marchal G, Suetens P. Multimodality image registration by maximization of mutual information. *IEEE Transactions on Medical Imaging*. 1997;16(2):187–198. doi:10.1109/42.563664.

27. Ourselin S, Roche A, Prima S, Ayache N. Block Matching: A General Framework to Improve Robustness of Rigid Registration of Medical Images. Springer Berlin Heidelberg; 2000. p. 557–566. Available from: [http://link.springer.com/10.1007/978-3-540-40899-4\\_{\\_}57](http://link.springer.com/10.1007/978-3-540-40899-4_{_}57).
28. Commowick O, Wiest-Daessle N, Prima S. Block-matching strategies for rigid registration of multimodal medical images. In: Proceedings - International Symposium on Biomedical Imaging; 2012. p. 700–703.
29. Pennec X. L'incertitude dans les problèmes de reconnaissance et de recalage – Applications en imagerie médicale et biologie moléculaire. Ecole Polytechnique X; 1996.
30. Horn BKP. Closed-form solution of absolute orientation using unit quaternions. *Journal of the Optical Society of America A*. 1987;4(4):629. doi:10.1364/JOSAA.4.000629.
31. Guimond A, Meunier J, Thirion JP. Average brain models: A convergence study. *Computer vision and image understanding*. 2000;77(2):192–210. doi:10.1006/cviu.1999.0815.
32. Legouhy A, Commowick O, Rousseau F, Barillot C. Unbiased longitudinal brain atlas creation using robust linear registration and log-euclidean framework for diffeomorphisms. In: ISBI 2019 - IEEE International Symposium on Biomedical Imaging. Venice, Italy: IEEE; 2019.
33. Arsigny V, Commowick O, Pennec X, Ayache N. A Log-Euclidean Framework for Statistics on Diffeomorphisms. Springer Berlin Heidelberg; 2006. p. 924–931. Available from: [http://link.springer.com/10.1007/11866565\\_{\\_}113](http://link.springer.com/10.1007/11866565_{_}113).
34. Vercauteren T, Pennec X, Perchant A, Ayache N. Symmetric Log-Domain Diffeomorphic Registration: A Demons-Based Approach. In: Medical Image Computing and Computer Assisted Intervention. Springer Berlin Heidelberg; 2008. p. 754–761. Available from: [http://link.springer.com/10.1007/978-3-540-85988-8\\_{\\_}90](http://link.springer.com/10.1007/978-3-540-85988-8_{_}90).

35. Bossa M, Hernandez M, Olmos S. Contributions to 3D Diffeomorphic Atlas Estimation: Application to Brain Images. In: MICCAI. vol. 4791 of LNCS; 2007. p. 667–74.
36. Gousias IS, Edwards AD, Rutherford MA, Counsell SJ, Hajnal JV, Rueckert D, et al. Magnetic resonance imaging of the newborn brain: Manual segmentation of labelled atlases in term-born and preterm infants. *NeuroImage*. 2012;62(3):1499–1509. doi:10.1016/j.neuroimage.2012.05.083.
37. Gousias IS, Hammers A, Counsell SJ, Srinivasan L, Rutherford MA, Heckemann RA, et al. Magnetic Resonance Imaging of the Newborn Brain: Automatic Segmentation of Brain Images into 50 Anatomical Regions. *PLoS ONE*. 2013;8(4). doi:10.1371/journal.pone.0059990.
38. Heckemann RA, Hajnal JV, Aljabar P, Rueckert D, Hammers A. Automatic anatomical brain MRI segmentation combining label propagation and decision fusion. *NeuroImage*. 2006;33(1):115–126. doi:10.1016/j.neuroimage.2006.05.061.
39. Prima S, Ourselin S, Ayache N. Computation of the mid-sagittal plane in 3-D brain images. *IEEE Transactions on Medical Imaging*. 2002;21(2):122–138. doi:10.1109/42.993131.
40. Seber GAF, Wild CJ. *Nonlinear Regression*; 1989.
41. Spiess AN, Neumeyer N. An evaluation of R<sup>2</sup> as an inadequate measure for nonlinear models in pharmacological and biochemical research: A Monte Carlo approach. *BMC Pharmacology*. 2010;10:1–11. doi:10.1186/1471-2210-10-6.
42. Akaike H. A new look at the statistical model identification. *IEEE Transactions on Automatic Control*. 1974;19(6):716–723. doi:10.1109/TAC.1974.1100705.
43. Burnham KP, Anderson DR. *Model Selection and Multimodel Inference*; 2002.
44. Burnham KP, Anderson DR. Multimodel inference: Understanding AIC and BIC in model selection. *Sociological Methods and Research*. 2004;33(2):261–304. doi:10.1177/0049124104268644.

45. Wagenmakers EJ, Ferrel S. AIC model selection using Akaike weights. *Psychonomic Bulletin & Review*. 2004;11(1):192–196. doi:10.1021/ef300604q.
46. Lane TP, DuMouchel WH. Simultaneous Confidence Intervals in Multiple Regression. *The American Statistician*. 1994;48(4):315–321. doi:10.2307/2684843.
47. Benjamini Y, Hochberg Y. Controlling the False Discovery Rate: A Practical and Powerful Approach to Multiple Testing. *Journal of the Royal Statistical Society*. 1995;57(1):289–300.

## A Detailed calculations for optimizing anisotropic similarity between two sets of paired points

### A.1

Let  $R$  be a rotation matrix. Then, an associated unit quaternion  $q$  is defined such as if  $Rx = q * x * \bar{q}$ . Thus:

$$\begin{aligned}\tilde{C}(q, S) &= \sum_i \|y'_i - q * \xi_i * \bar{q}\|^2 \\ &= \sum_i \|y'_i * q - q * \xi_i\|^2\end{aligned}\tag{17}$$

### A.2

If  $p$  is a vector, the associated quaternion is pure:  $p_1 = 0$  which implies that  $Q_p$  and  $P_p$  are skew-symmetric. Yet  $y'_i$  and  $\xi_i$  are vectors, thus:

$$\begin{aligned}\tilde{C}(q, S) &= \sum_i \|y'_i * q - q * \xi_i\|^2 \\ &= q^T \left( \sum_i (Q_{y'_i} + P_{\xi_i})^T (Q_{y'_i} + P_{\xi_i}) \right) q \\ &= q^T \left( - \sum_i (Q_{y'_i} + P_{\xi_i})^2 \right) q\end{aligned}\tag{18}$$

### A.3

If  $p$  is a vector, the associated quaternion is pure:  $p_1 = 0$  which implies that  $Q_p$  and  $P_p$  are skew-symmetric and  $Q_p^2 = P_p^2 = -p^T p I_4$ .



Yet  $y'_i$  and  $\xi_i$  are vectors, thus:

$$\begin{aligned}
 \tilde{C}(q, S) &= -q^T \left( \sum_i (Q_{y'_i} + P_{\xi_i})^2 \right) q \\
 &= -q^T \left( \sum_i (Q_{y'_i}^2 + 2Q_{y'_i}P_{\xi_i} + P_{\xi_i}^2) \right) q \\
 &= -q^T \left( \sum_i (-y'^T_i y'_i I_4 + 2Q_{y'_i}P_{\xi_i} - \xi_i^T \xi_i I_4) \right) q \\
 &= -q^T \left( \sum_i (-y'^T_i y'_i I_4 + 2Q_{y'_i}P_{\xi_i} - \tilde{x}_i^T S^2 \tilde{x}_i I_4) \right) q
 \end{aligned} \tag{19}$$

Thus:

$$\frac{\partial \tilde{C}}{\partial s_j} = -q^T \left( \sum_i (2Q_{y'_i} \frac{\partial P_{\xi_i}}{\partial s_j} - 2\tilde{x}_i^T s_j E_{jj} \tilde{x}_i) \right) q$$

$E_{jj}$  being the matrix with a 1 at the intersection of the  $j^{\text{th}}$  row and the  $j^{\text{th}}$  column and 0 elsewhere.

$$= -2q^T \left( \sum_i Q_{y'_i} \frac{\partial P_{\xi_i}}{\partial s_j} \right) q + 2q^T \left( s_j \sum_i \tilde{x}_{ji}^2 \right) q$$

yet  $\sum_i \tilde{x}_{ji}^2$  scalar and  $q^T q = 1$

$$\begin{aligned}
 &= -q^T \left( \sum_i Q_{y'_i} \frac{\partial P_{\xi_i}}{\partial s_j} \right) q + s_j \sum_i \tilde{x}_{ji}^2 \\
 \frac{\partial \tilde{C}}{\partial s_j} = 0 &\Leftrightarrow \hat{s}_j = \frac{1}{\sum_i \tilde{x}_{ji}^2} q^T \left( \sum_i Q_{y'_i} \frac{\partial P_{\xi_i}}{\partial s_j} \right) q
 \end{aligned} \tag{20}$$

#### A.4

$$\begin{aligned}
 Q_{y'_i} \frac{\partial P_{\xi_i}}{\partial s_1} &= \tilde{x}_{1i} \begin{pmatrix} y'_{1i} & 0 & -y'_{3i} & y'_{2i} \\ 0 & y'_{1i} & y'_{2i} & y'_{3i} \\ -y'_{3i} & y'_{2i} & -y'_{1i} & 0 \\ y'_{2i} & y'_{3i} & 0 & -y'_{1i} \end{pmatrix}, & Q_{y'_i} \frac{\partial P_{\xi_i}}{\partial s_2} &= \tilde{x}_{2i} \begin{pmatrix} y'_{2i} & y'_{3i} & 0 & -y'_{1i} \\ y'_{3i} & -y'_{2i} & y'_{1i} & 0 \\ 0 & y'_{1i} & y'_{2i} & y'_{3i} \\ -y'_{1i} & 0 & y'_{3i} & -y'_{2i} \end{pmatrix} \\
 \text{and } Q_{y'_i} \frac{\partial P_{\xi_i}}{\partial s_3} &= \tilde{x}_{3i} \begin{pmatrix} y'_{3i} & -y'_{2i} & y'_{1i} & 0 \\ -y'_{2i} & -y'_{3i} & 0 & y'_{1i} \\ y'_{1i} & 0 & -y'_{3i} & y'_{2i} \\ 0 & y'_{1i} & y'_{2i} & y'_{3i} \end{pmatrix}
 \end{aligned} \tag{21}$$
